# Supplementary material
Source: PubMed Central journal article supplement (PMC3581916)
Supplement: 1210626110_pnas.201210626SI.pdf [file 1210626110_pnas.201210626SI.pdf]

# Supporting Information

Chatonnet et al. 10.1073/pnas.1210626110

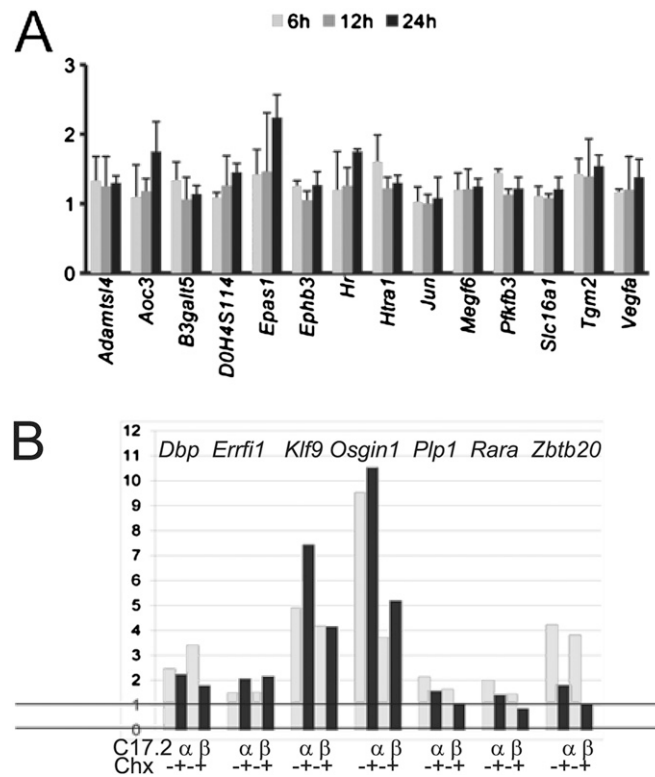

**Fig. S1.** Absence of response without exogenous TR and effect of cycloheximide. (A) Time-course analysis [0, 6, 12, and 24 h after 3,3',5-triiodo-L-thyronine (T3) treatment] of gene expression in C17.2. Quantitative (q)PCR indicates minimal effect of T3, compared with that in Fig. 3. (B) Induction by T3 (6 h) in the presence of cycloheximide, a translation inhibitor. The drug has no effect if genes are directly regulated by liganded TR. The observed effect for *Zbtb20* is an indication that T3-mediated induction of this gene is a secondary event and that this gene is not a direct TR target.

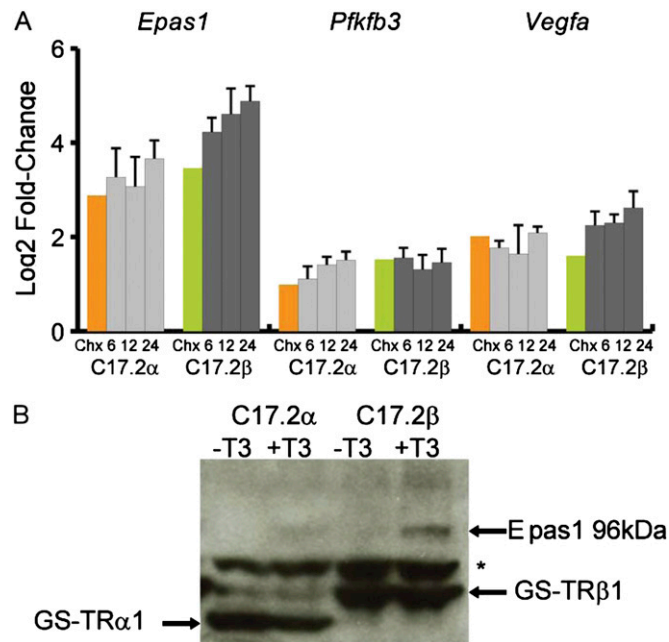

**Fig. S2.** Activation by T3 of hypoxia pathway genes in C17.2 $\alpha$  and C17.2 $\beta$  cells. (A) Quantitative (Q)-RT-PCR analysis of *Epas1*, *Pfkfb3*, and *Vegfa* expression after 6, 12, or 24 h of T3 stimulation (light grey: C17.2 $\alpha$ , dark grey: C17.2 $\beta$ ). The presence of cycloheximide has no significant effect on the response at 6 h (orange: C17.2 $\alpha$ , green: C17.2 $\beta$ ), suggesting that the three genes can be directly regulated by T3. *Pfkfb3* and *Vegfa* are, however, thought to be EPAS1 target genes and to provide a link between EPAS1, glucose metabolism, and vasculogenesis. (B) Western blot analysis of EPAS1 in C17.2 $\alpha$  and C17.2 $\beta$  cells after 24 h of T3 stimulation. The antibody identifies the EPAS1 protein in T3-stimulated cells only. Due to cross-reactivity with the GS-derived tag, the antibody also recognizes GS-TR $\alpha$ 1 and GS-TR $\beta$ 1. Asterisk indicates a nonspecific band.

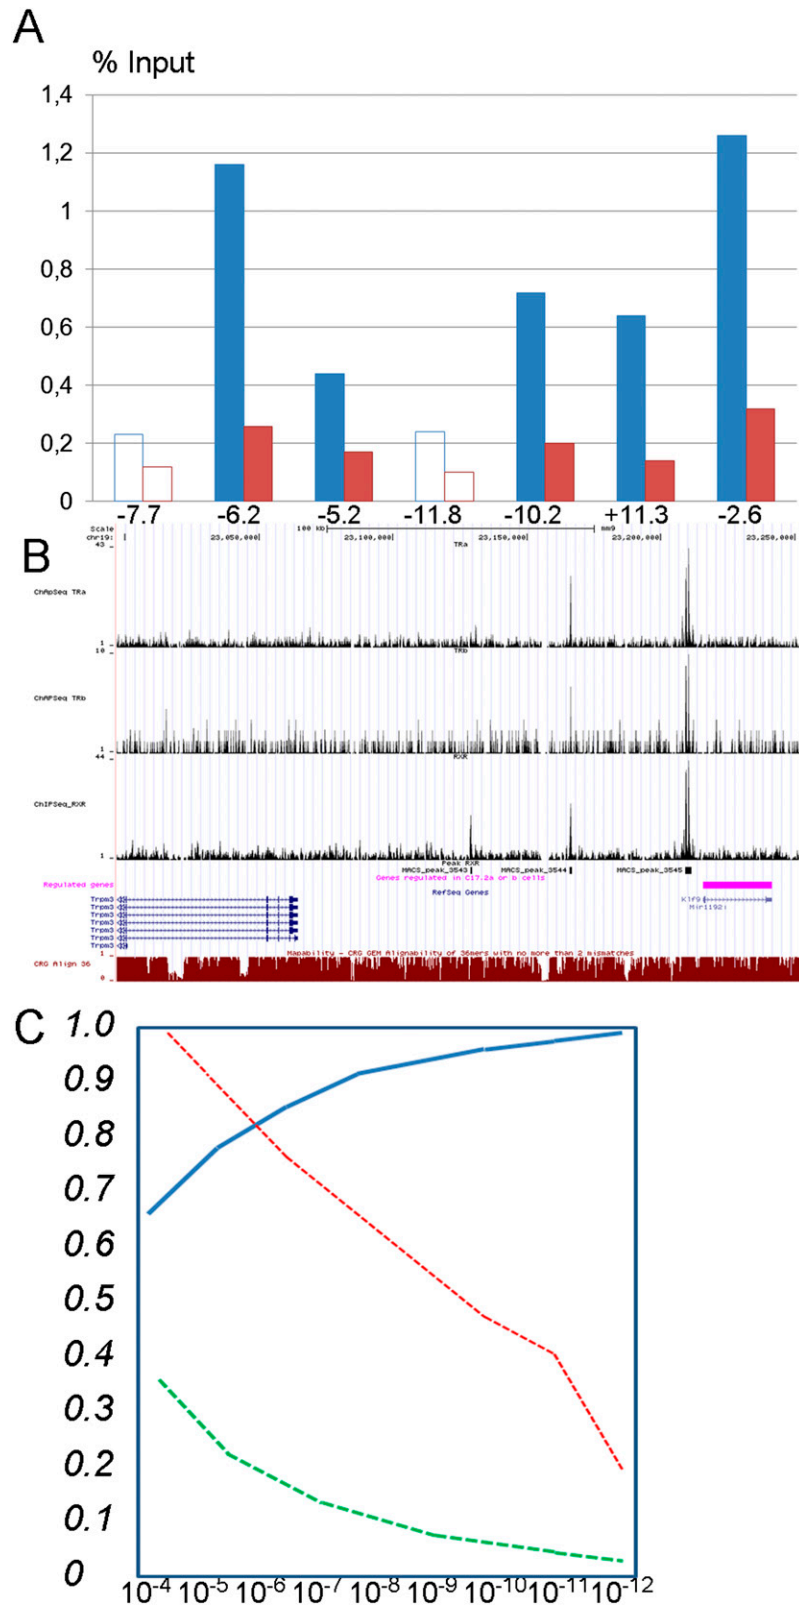

**Fig. S3.** Retinoid X receptor (RXR) chromatin immunoprecipitation (ChIP)-Seq in C17.2 $\alpha$  cells. (A) Chromatin immunoprecipitation in C17.2 $\alpha$  cells with a RXR antibody. Cross-linked chromatin was incubated first with an anti-RXR antibody and then with IgA-coupled beads. Blue columns represents the percentage of input observed after chromatin immunoprecipitation with a RXR antibody. A small but significant enrichment (red columns) was also observed at the TR/RXR binding site when the RXR antibody is omitted, due to the cross-reaction between the IgA-coupled beads and the protein-G-derived tag present on TR. Open columns are control regions without TR binding, used to evaluate background contamination. (B) Example of ChIP-Seq result. Some binding sites are different from the one obtained after TR chromatin affinity purification (ChAP)-Seq and thus correspond to complexes containing RXR but not TR. (C) Influence of P-value threshold. x axis is the P value calculated by the MACS algorithm for peak calling. The y axis represent various ratios. The blue line represents the ratio  $\frac{\text{RXR ChIP-Seq}}{\text{Input}}$ . The red dashed line represents the ratio  $\frac{\text{Control ChIP-Seq}}{\text{Input}}$ . The green dashed line represents the ratio  $\frac{\text{ChIP-Seq without TR}}{\text{Input}}$ . Legend continued on following page

of TRBS detected in the TR $\alpha$ 1 ChAP-Seq experiment that overlap with the RXR binding sites detected by CHIP-Seq. As explained in the text, IgG/protein-A interaction introduces a contamination of the RXR CHIP-Seq by G $\beta$ -TR $\alpha$ 1-containing complexes, and 100% of overlap is thus expected. On the basis of this assumption we calculated the false discovery rate for TR $\alpha$ 1 binding sites (green dashed line). The discovery rate (red dashed line) was calculated for the peaks that overlap between the TR $\alpha$ 1 ChAP-Seq dataset and the RXR CHIP-Seq dataset, with a P value  $<10^{-4}$  in each experiment. Comparison with Fig. 5 confirms the existence of TR $\beta$ 1-specific peaks.

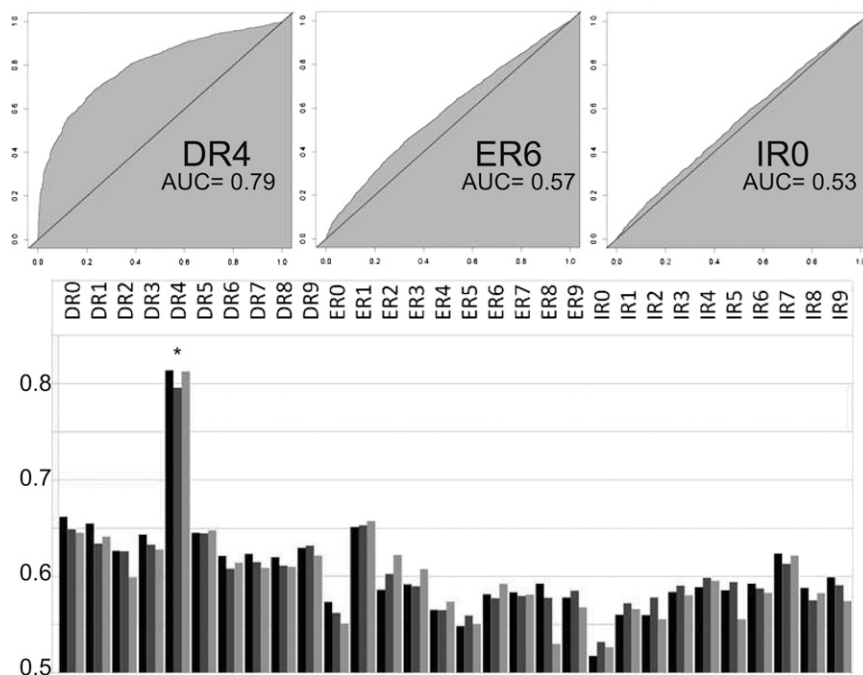

**Fig. S4.** ROC curves analysis. Enrichment in the various types of response elements was assessed by comparing the frequency of discovery of the consensus in the TRBS (y axis) and in a set of randomly generated sequences (same size, same GC content, x axis) for a changing score threshold. In absence of enrichment, the area under the curve (AUC) is close to 0.5. (Upper) The ROC curve for DR4, ER6, and IR0 elements is presented for all TRBS, confirming that only DR4 elements are overrepresented in TRBS. (Lower) The histogram provides all AUCs obtained when the analysis is performed for three groups of TRBS: all TRBS (solid bars), TR $\alpha$ -specific TRBS (bars with dark shading), and TRBS proximal to T3-regulated genes (bars with light shading). As only 240 TR $\beta$ 1-specific TRBS were detected, this small set of TRBS was not included in the analysis. DR4 is the only arrangement for which the AUC clearly stands out. The enrichment values are not different for the three categories of TRBS that are considered.

**Table S1. Digital gene expression libraries**

| Sample                     | Total beads, $\times 10^7$ | Total counted, $\times 10^7$ | Total match unique, $\times 10^7$ | Total match multiple, $\times 10^6$ |
|----------------------------|----------------------------|------------------------------|-----------------------------------|-------------------------------------|
| C17.2 $\alpha$ , 6 h, -T3  | 2.06                       | 1.29                         | 1.09                              | 2.07                                |
| C17.2 $\alpha$ , 6 h, +T3  | 1.53                       | 1.01                         | 0.81                              | 1.88                                |
| C17.2 $\alpha$ , 12 h, -T3 | 1.65                       | 1.13                         | 0.89                              | 2.35                                |
| C17.2 $\alpha$ , 12 h, +T3 | 2.18                       | 1.41                         | 1.13                              | 2.81                                |
| C17.2 $\alpha$ , 24 h, -T3 | 1.69                       | 0.98                         | 0.92                              | 0.59                                |
| C17.2 $\alpha$ , 24 h, +T3 | 1.43                       | 0.83                         | 0.78                              | 0.52                                |
| C17.2 $\beta$ , 6 h, -T3   | 2.89                       | 1.91                         | 1.54                              | 3.66                                |
| C17.2 $\beta$ , 6 h, +T3   | 1.39                       | 0.94                         | 0.75                              | 1.85                                |
| C17.2 $\beta$ , 12 h, -T3  | 1.67                       | 1.12                         | 0.90                              | 2.09                                |
| C17.2 $\beta$ , 12 h, +T3  | 1.72                       | 1.13                         | 0.93                              | 1.97                                |
| C17.2 $\beta$ , 24 h, -T3  | 1.27                       | 0.73                         | 0.67                              | 0.62                                |
| C17.2 $\beta$ , 24 h, +T3  | 1.24                       | 0.71                         | 0.65                              | 0.59                                |

Total beads, number of beads with a single tag; total counted, number of sequenced tags matching a RefSeq transcript with at most one mismatch; unique/multiple indicates the number of tags allocated to a unique transcript or to several transcripts.

**Table S2. Chromatin affinity/immunoprecipitation high-throughput sequencing libraries**

| Sample              | Total quality filtered reads, $\times 10^7$ | Total reads aligned, $\times 10^7$ | Total unique match, $\times 10^7$ |
|---------------------|---------------------------------------------|------------------------------------|-----------------------------------|
| ChAP C17.2 $\alpha$ | 3.14                                        | 2.03                               | 1.98                              |
| ChAP C17.2 $\beta$  | 2.85                                        | 1.98                               | 1.66                              |
| ChIP RXR            | 3.08                                        | 1.66                               | 1.60                              |

Total quality filtered reads, number of reads that passed the sequencing quality controls; total reads aligned, number of reads aligned on the mm9 mouse genome; total unique match, number of reads that match only one genomic location (no repeat sequence).

**Table S3. Transactivation properties of individual TRBS**

| Binding site | Chr | Summit position | DR4-like sequence (similarity)               | Gene (distance to TSS, kb) | T3 induction rate of gene, 12 h |               | Transactivation in pGL2-TRBS-luc by |              |
|--------------|-----|-----------------|----------------------------------------------|----------------------------|---------------------------------|---------------|-------------------------------------|--------------|
|              |     |                 |                                              |                            | C17.2 $\alpha$                  | C17.2 $\beta$ | TR $\alpha$ 1                       | TR $\beta$ 1 |
| A-TRBS-5973  | 7   | 52,963,226      | <u>CCGGGTCAGCCGAGGACAC</u> (0.97)            | <i>Dbp</i> (+2.6)          | 1.3                             | 2.1           | 1.42                                | 4.78         |
| A-TRBS-3567  | 19  | 23,209,439      | <u>CGGGGTTATGCGAGGTAAC</u> (0.89)            | <i>Klf9</i> (-6.2)         | 2.0                             | 3.9           | 1.24                                | 1.47         |
| A-TRBS-3568  | 19  | 23,210,491      | <u>CAGGTTCA<del>TTT</del>GAGGACAG</u> (0.92) | <i>Klf9</i> (-5.2)         | 2.0                             | 3.9           |                                     |              |
| B-TRBS-6508  | 4   | 94,719,071      | No DR4                                       | <i>Jun</i> (-0.1)          | 0.4                             | 0.4           | 0.19                                | 0.53         |
| A-TRBS-4394  | 3   | 95,480,909      | <u>ATTGGTCATCTGAGGACAG</u> (1.0)             | <i>Adamts14</i> (-10.9)    | 0.8                             | 6.0           | 0.95                                | 1.87         |
| A-TRBS-6181  | 7   | 138,112,268     | No DR4                                       | <i>Htra1</i> (+32.5)       | 1.9                             | 3.0           | 8.02                                | 9.72         |
| A-TRBS-6182  | 7   | 138,121,594     | <u>TAAGGTCACCTGAGGCCGG</u> (0.85)            | <i>Htra1</i> (+41.9)       | 1.9                             | 3.0           | 0.36                                | 1.05         |
| A-TRBS-3280  | 17  | 87,268,845      | <u>CGGGGTGACCTGGGGCCAC</u> (0.98)            | <i>Epas1</i> (+115.6)      | 21.4                            | 25.9          | 0.19                                | 0.42         |
| pGL2-DR4-Luc | NA  | NA              | <u>AGGTCANNNNAGGTCA</u> (1.0)                | NA                         | NA                              | NA            | 104                                 | 85           |
| pGL2-Luc     | NA  | NA              | NA                                           | NA                         | NA                              | NA            | 0.26                                | 0.37         |

Data on T3 induction are from Table 2. The last two columns report assays performed in HEK293 cells after insertion of TRBS-containing fragments in the pGL2-Luciferase reporter vector. For *Klf9*, the two TRBS were inserted together. Underlined bases indicate the TRBS consensus half-sites. The indicated consensus DR4 was used as a positive control. NA: not applicable.

**Table S4. Genes with a proximal TRBS overlapping a CTCF binding site**

| Gene symbol | Chr   | Cluster | Binding site(s) name(s)            |
|-------------|-------|---------|------------------------------------|
| Abca1       | Chr4  | 3       | A_MACS_peak_4697                   |
| Adamtsl4    | Chr3  | 6       | A_MACS_peak_4394                   |
| Apol9b      | Chr15 | 5       | A_MACS_peak_2573                   |
| Asb8        | Chr15 | 6       | A_MACS_peak_2660                   |
| C1qtnf1     | Chr11 | 3       | A_MACS_peak_1465                   |
| Cebpb       | Chr2  | 6       | A_MACS_peak_4126                   |
| Cuedc1      | Chr11 | 6       | A_MACS_peak_1303                   |
| Ddr1        | Chr17 | 10      | A_MACS_peak_3121                   |
| Fasn        | Chr11 | 4       | A_MACS_peak_1475                   |
| Foxred2     | Chr15 | 6       | A_MACS_peak_2575                   |
| Fxyd3       | Chr7  | 0       | B_MACS_peak_8015                   |
| Gpr146      | Chr5  | 6       | A_MACS_peak_5442, A_MACS_peak_5444 |
| Grhpr       | Chr4  | 1       | A_MACS_peak_4671                   |
| H1fx        | Chr6  | 10      | A_MACS_peak_5696                   |
| Hadh        | Chr3  | 2       | A_MACS_peak_4508                   |
| Hibch       | Chr1  | 2       | A_MACS_peak_129                    |
| Hk1         | Chr10 | 6       | A_MACS_peak_733                    |
| Hr          | Chr14 | 3       | A_MACS_peak_2260                   |
| Inpp1       | Chr1  | 2       | A_MACS_peak_129                    |
| Itgb3       | Chr11 | 6       | A_MACS_peak_1392                   |
| Jun         | Chr4  | 9       | B_MACS_peak_6508                   |
| Ldlrap1     | Chr4  | 6       | A_MACS_peak_4979                   |
| Lgi4        | Chr7  | 4       | B_MACS_peak_8015                   |
| Lpin3       | Chr2  | 3       | A_MACS_peak_4098                   |
| Mapkapk3    | Chr9  | 4       | A_MACS_peak_6854                   |
| Mcam        | Chr9  | 7       | A_MACS_peak_6672                   |
| Mtap7d1     | Chr4  | 6       | A_MACS_peak_4942, A_MACS_peak_4943 |
| Ncoa4       | Chr14 | 2       | A_MACS_peak_2163                   |
| Nfix        | Chr8  | 6       | A_MACS_peak_6428                   |
| Nr1d1       | Chr11 | 2       | A_MACS_peak_1350                   |
| Nrp1        | Chr8  | 2       | A_MACS_peak_6562                   |
| Nudt18      | Chr14 | 6       | A_MACS_peak_2260                   |
| Pcdh7       | Chr5  | 5       | B_MACS_peak_7008                   |
| Plxnd1      | Chr6  | 6       | A_MACS_peak_5773                   |
| Rfng        | Chr11 | 6       | A_MACS_peak_1475                   |
| Slc25a33    | Chr4  | 5       | A_MACS_peak_5050                   |
| Usp2        | Chr9  | 5       | A_MACS_peak_6672                   |
| Zfp809      | Chr9  | 5       | A_MACS_peak_6611                   |
| Zhx3        | Chr2  | 1       | A_MACS_peak_4098                   |
| Zmiz1       | Chr14 | 1       | B_MACS_peak_2761                   |

Data from the ENCODE/LICR adult mouse cerebellum CTCF CHIP-Seq track of the University of California, Santa Cruz (UCSC) mouse genome browser were compared with our cistrome analysis to identify genes where CTCF and TR binding might coincide in cerebellum neurons.

**Table S5. Primers used for gene expression**

| Gene               | Forward primer           | Reverse primer             |
|--------------------|--------------------------|----------------------------|
| <i>Adamts14</i>    | TCCAAGCCCCGATGCCAGAGTA   | GGCAGCTGATGAGAAGGTCCAAACA  |
| <i>Aoc3</i>        | TCACTTGGCTGTGACCCAGAGGA  | AAAAAGCCAGCCGTACCCAGG      |
| <i>B3galt5</i>     | CGAACGTGAGCTCTTACTCGGCA  | TCACCAGCAGCACCCAGGAAAGG    |
| <i>DOH4S114</i>    | TGAACAGGGAGCGGGCTTTTG    | AGCGCCAGTCTCCTCCATCTTCT    |
| <i>Dbp</i>         | GAAGGCAAGGAAAGTCCAGGTGCC | GCTCCTGCCGCACAGCCA         |
| <i>Epas1</i>       | TGGACATCCCCCTGGACAGCAA   | GGTCATGTTCTCCGAATCCAGGGCA  |
| <i>Ephb3</i>       | TCTACTGCAATGGCGACGGGGA   | CCGAGTCTGAGTCTGCACGGTAGAA  |
| <i>Errfi1</i>      | AAGTCTGCTGGGGCAGTCACA    | TCACGCTGTCCCAGCTTTTCAC     |
| <i>Hprt</i>        | CAGCGTCGTGATTAGCGATG     | CGAGCAAGTCTTTCAGCTGTCC     |
| <i>Hr</i>          | GCCTTGCTTCTATGATTGTCTCC  | AGAGGTCCAAGGAGCATCAAGG     |
| <i>Htra1</i>       | ACGCCAAGACCTACACCACTGT   | ACGCCAACTGTTGGGATCTTCTGC   |
| <i>Jun</i>         | AGAACGTGACCGACGAGCAGGA   | CCGGTTGAAGTTGCTGAGGTTGG    |
| <i>Klf9</i>        | CACGCCCTCCGAAAAGAGGCACAA | CTTTTCCCCAGTGTGGGTCCGGTA   |
| <i>Megf6</i>       | ACGTGTGTACATGCGGGCAAGG   | AGCATGACACAGGCCCCCATTC     |
| <i>Osgin1</i>      | TCCAGACAACCCAGGCTCACCA   | TGGACGGCTCCTGGTTTCACGTA    |
| <i>Pfkfb3</i>      | CAGCTTTGAGGAGCGTGTGGCT   | GGACAAGGCAGGCTGTGGAAA      |
| <i>Plp1</i>        | GGCGACTACAAGACCACCATCTGC | ACACCAGGAGCCATACAACAGTCAGG |
| <i>Rara</i>        | TCAGCGCCTGTGAGGGCTGTAA   | TCAGGCGTCAGCGTGTAGCTCT     |
| <i>Slc16a1</i>     | TCGTGTAGGTGCAGCAGCCAAG   | TGTATCCCACTGGCCCTCCAATCG   |
| <i>Tgm2</i>        | AGAAACTGGTGTGCTGCTCGTGG  | TGCAGAGCTGTAGCGAGAGGACA    |
| <i>Thra (TRα1)</i> | TGCCTTAACTGGATGACAC      | TCGACTTTCATGTGGAGGAAG      |
| <i>Thrb</i>        | AGCCAGAACCCACGGATGAGGA   | TGCCACCTTCTGGGGCATTTCAC    |
| <i>Vegfa</i>       | CCAGGCTGCACCCACGACAG     | CGCATCAGCGGCACACAGGA       |
| <i>Zbtb20</i>      | CCAGCCCTCATCCACTGCACACAT | GCGAACCGTCACGTACAGAAGT     |

**Table S6. Primers used for chromatin immuno- or affinity precipitation analysis**

| Binding site | Forward primer            | Reverse primer           |
|--------------|---------------------------|--------------------------|
| A-TRBS-5973  | TCGGCTGACCCGGGCTTATTTG    | TTTGTCCCACTGCTGTGTCGGAG  |
| A-TRBS-3567  | ACATCGGGGAGAATGGGTGGGA    | TTGTCCAACGAGCGCCAGACAC   |
| A-TRBS-3568  | TGCACGAGTTTGGGCGGATTC     | TGGGCCTGGCATCGCCCTTTTA   |
| B-TRBS-6508  | TGTCTCTGCCAAGTCACTGCAAC   | CCCTGAGAACGACGCAAGCCAA   |
| A-TRBS-4394  | GCGGCAGCAGGTAGTTGTGTAGTAG | GGGGATGGAGTTGGACTATGGGCA |
| A-TRBS-6181  | TCCCATGATTTGGCCCTGCCTG    | ACGGGAAGAGGACAGCATCCAGA  |
| A-TRBS-6182  | AGCTTGCTGCGTGCCATTGGA     | TGCTTGGCCAGTGGGTGAGCTA   |
| A-TRBS-3280  | GTCACCCCGGGGCTCAAGGA      | CACCAGCCGAATGTGACAGGCA   |
| A-TRBS-3281  | CGGCTGGGGGAGGCCTACAG      | GCCAGGGCAAGGGTGTGACC     |
| A-TRBS-6445  | AGAGGCCTAGTTAGCTCATCCGTGG | TGCAGTAGCAGGGGGAGGAGG    |
| B-TRBS-6937  | CCTGGTGGCCGCTCCAACATC     | TCGCTCAATCTCCCCTCCGTCA   |
| A-TRBS-3729  | ACGCAGACCTGCTTCTAGGCCA    | ATCCTCTACTGTATCCGCGCCCA  |
| A-TRBS-4531  | GCCCAAACAACCACTCGGTTCCA   | TCGAGAAGCGAAAGCACCCAAACC |
